# Supplementary material for: 酵母Lipomyces starkeyi IAM4753の栄養要求性
Source: Royal Society of Chemistry journal article supplement (doi:10.1039/c8ra05029e), 1971-01-01
Supplement: c8ra05029e1.pdf [file c8ra05029e1.pdf]

## Supplementary Material

### 1. Computational methods

The first-principle calculations were performed by the application of DFT method with the combination of Vanderbilt-type ultrasoft pseudopotential and a plane-wave expansion of the wave functions [1] implemented in the CASTEP [2] module of Materials Studio 6.0 [3]. The self-consistent ground state of system was determined by using a band-by-band conjugated gradient technique to minimize the total energy of the system with respect to the plane-wave coefficients. The electronic wave functions were obtained in a density-mixing minimization method [4] for the self-consistent field calculation and the structures were relaxed using the Broyden, Fletcher, Goldfarb, and Shannon (BFGS) [5] method. The cutoff energy of plane waves was set to 340 eV. Brillouin zones sampling was carried out by using the Monkhost–Pack scheme with a  $k$ -point grid of  $1 \times 3 \times 1$ . The values of the kinetic energy cutoff and the  $k$ -point grid were determined to ensure the convergence of total energies.

The initial crystal was taken from Zhang *et al.* (CCDC 1042895) [6] and designed to the following computations. All the calculations are on the basis of the same experimental crystal structure of NTO/TZTN. The total energy of the system was converged less than  $1.0 \times 10^{-5}$  eV, the residual force less than  $0.03 \text{ eV}\cdot\text{\AA}^{-1}$ , the displacement of atoms less than  $0.001 \text{ \AA}$ , and the residual bulk stress less than 0.05 GPa. Single point energies calculations were conducted at the B97-D/6-311++G\*\* level of DFT with Gaussian 09 [7] suite. Previous studies showed that the performance of B97-D for H-bond systems is exceptionally good [8-10].

### References

- [1] D. Vanderbilt, Soft self-consistent pseudopotentials in generalized eigenvalue formalism, *Phys. Rev. B* 41 (1990) 7892-7895.
- [2] S.J. Clark, M.D. Segall, C.J. Pickard, P.J. Hasnip, M.J. Probert, K. Refson, M.C. Payne, First principles methods using CASTEP, *Z. Krist-Cryst Mater.* 220 (2005) 567-570.
- [3] Materials Studio 6.0, Accelrys Inc, San Diego, 2012.
- [4] G. Kresse, J. Furthmuller, Efficient iterative schemes for ab initio total-energy calculations using a plane-wave basis set, *Phys. Rev. B* 54 (1996) 11169-11186.

- [5] R. Fletcher, in: *Practical Methods of Optimization*, Wiley, New York, 1980, pp. 101-123.
- [6] P. Yin, D.A. Parrish, J.M. Shreeve, Energetic multifunctionalized nitraminopyrazoles and their ionic derivatives: Ternary hydrogen-bond induced high energy density materials, *J. Am. Chem. Soc.* 137 (2015) 4778-4786.
- [7] M.J. Frisch, G.W. Trucks, H.B. Schlegel, G.E. Scuseria, M.A. Robb, J.R. Cheeseman, G. Scalmani, V. Barone, B. Mennucci, G.A. Petersson, H. Nakatsuji, M. Caricato, X. Li, H.P. Hratchian, A.F. Izmaylov, J. Bloino, G. Zheng, J.L. Sonnenberg, M. Hada, M. Ehara, K. Toyota, R. Fukuda, J. Hasegawa, M. Ishida, T. Nakajima, Y. Honda, O. Kitao, H. Nakai, T. Vreven, J.A. Montgomery, J.E. Peralta, F. Ogliaro, M. Bearpark, J.J. Heyd, E. Brothers, K.N. Kudin, V.N. Staroverov, R. Kobayashi, J. Normand, K. Raghavachari, A. Rendell, J.C. Burant, S.S. Iyengar, J. Tomasi, M. Cossi, N. Rega, J.M. Millam, M. Klene, J.E. Knox, J.B. Cross, V. Bakken, C. Adamo, J. Jaramillo, R. Gomperts, R.E. Stratmann, O. Yazyev, A.J. Austin, R. Cammi, C. Pomelli, J.W. Ochterski, R.L. Martin, K. Morokuma, V.G. Zakrzewski, G.A. Voth, P. Salvador, J.J. Dannenberg, S. Dapprich, A.D. Daniels, O. Farkas, J.B. Foresman, J.V. Ortiz, J. Cioslowski, D.J. Fox, *Gaussian 09, Revision A.02* Gaussian Inc, Wallingford CT, 2009.
- [8] S. Grimme, Semiempirical GGA-type Density functional constructed with a long-range dispersion correction, *J. Comput. Chem.* 27 (2006) 1787-1799.
- [9] X.L. Zhang, X.D. Gong, Screening nitrogen-rich bases and oxygen-rich acids by theoretical calculations for forming highly stable salts, *Chem. Phys. Chem.* 15 (2014) 2281-2287.
- [10] F. Wang, D.C. Du, H. Liu, X.D. Gong, Hydrogen-bonding interactions and properties of energetic nitroamino [1,3,5]triazine-based guanidinium salts: DFT-D and QTAIM studies, *Chem. Asian. J.* 7 (2012) 2577-2591.

## 2. Density of states (DOS)

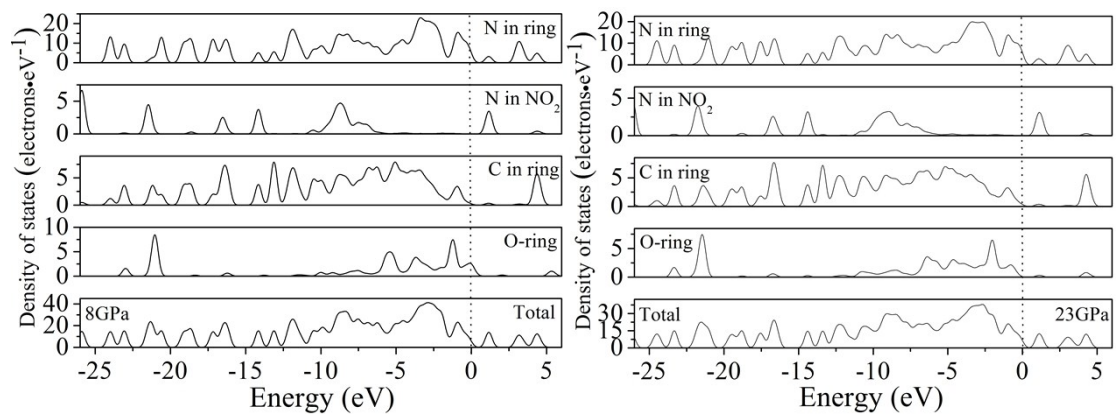

**Fig. 1** The atom-resolved DOS and PDOS of cocystal NTO/TZTN at 8 GPa, and 23 GPa.
